# Supplementary material for: Evidence of association between higher cardiorespiratory fitness and higher cerebral myelination in aging
Source: PubMed Central journal article supplement — Proc Natl Acad Sci U S A. 2024 Aug 19;121(35):e2402813121. doi: 10.1073/pnas.2402813121 (PMC11363304; doi:10.1073/pnas.2402813121), 2024-08-19
Supplement: pnas.2402813121.sapp.pdf [file pnas.2402813121.sapp.pdf]

## **Supporting Information for**

Evidence of association between higher cardiorespiratory fitness and higher cerebral myelination in aging.

Mary E. Faulkner, Zhaoyuan Gong, Murat Bilgel, John P. Laporte, Alex Guo, Jonghyun Bae, Elango Palchamy, Mary Kaileh, Christopher M. Bergeron, Jan Bergeron, Sarah Church, Jarod D'Agostino, Luigi Ferrucci and Mustapha Bouhrara

Corresponding author: Mustapha Bouhrara  
Email: bouhraram@mail.nih.gov

### **This PDF file includes:**

Figures S1 to S5  
Tables S1 to S2

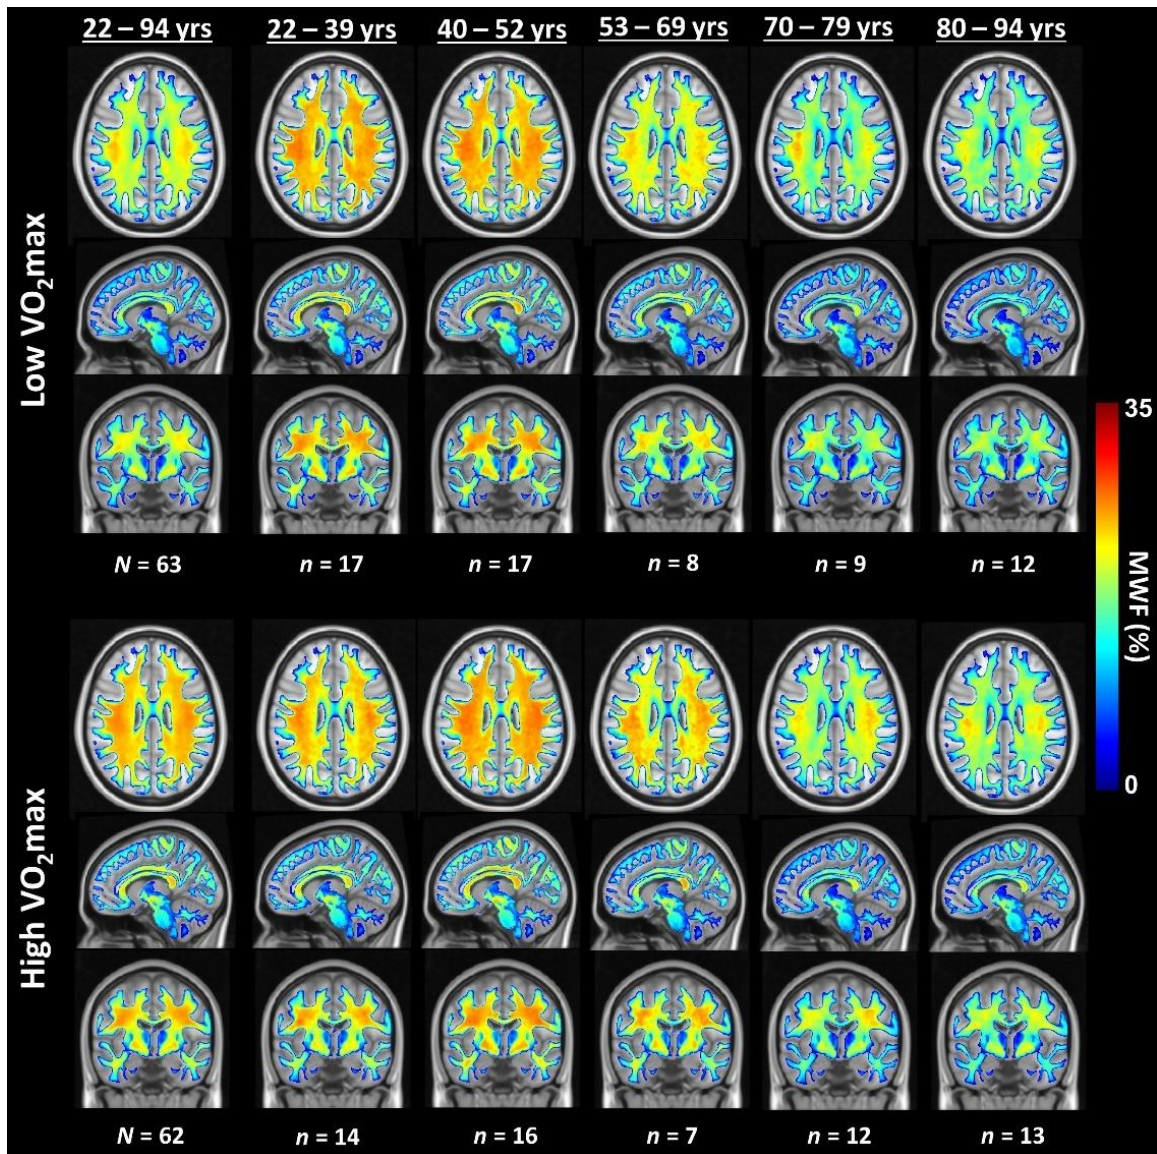

**Fig. S1.** Examples of axial, sagittal, and coronal myelin water fraction (MWF) parameter maps averaged across participants with either low or high levels of maximum rate of oxygen consumption ( $VO_{2max}$ ). Participants were drawn from the full age range as well as from restricted age ranges to mitigate the effect of age. Within a given age range, low  $VO_{2max}$  corresponds to values less than the mean  $VO_{2max}$ , while high  $VO_{2max}$  corresponds to values equal to or greater than the mean  $VO_{2max}$ . Results are shown for representative slices. Visual inspection indicates that, overall, participants with higher  $VO_{2max}$  levels exhibit greater regional MWF values, especially at middle and older ages.

Model 1

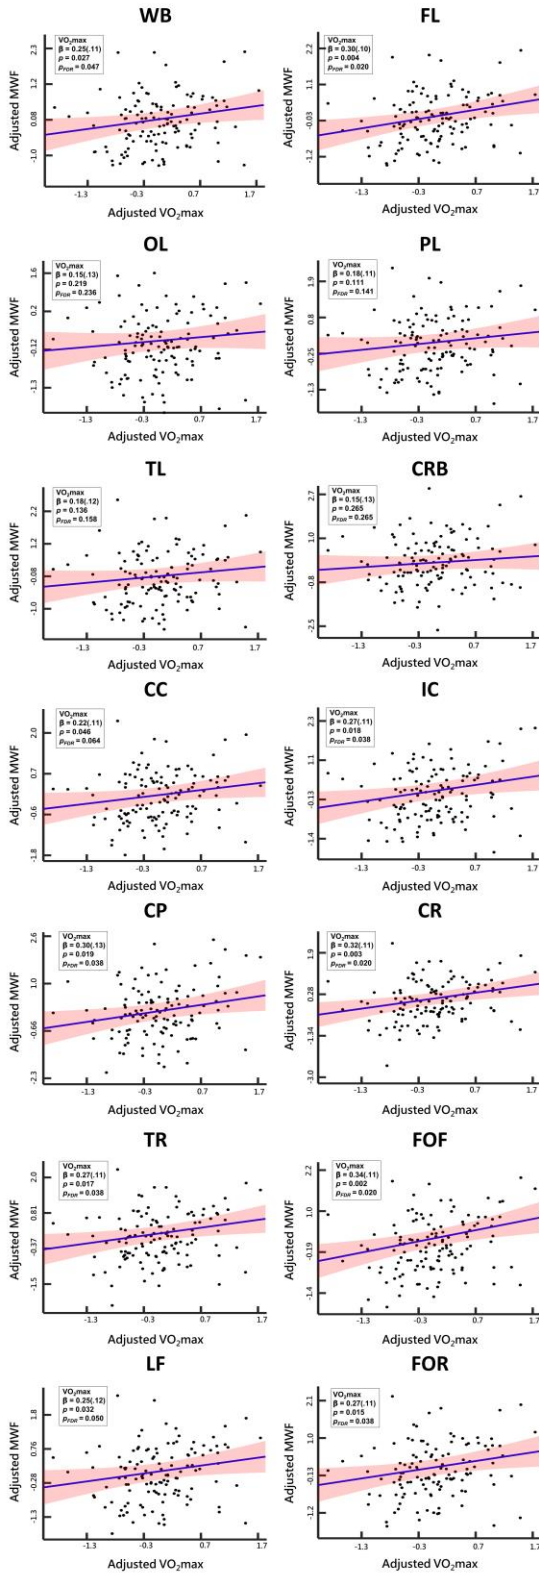

Model 2

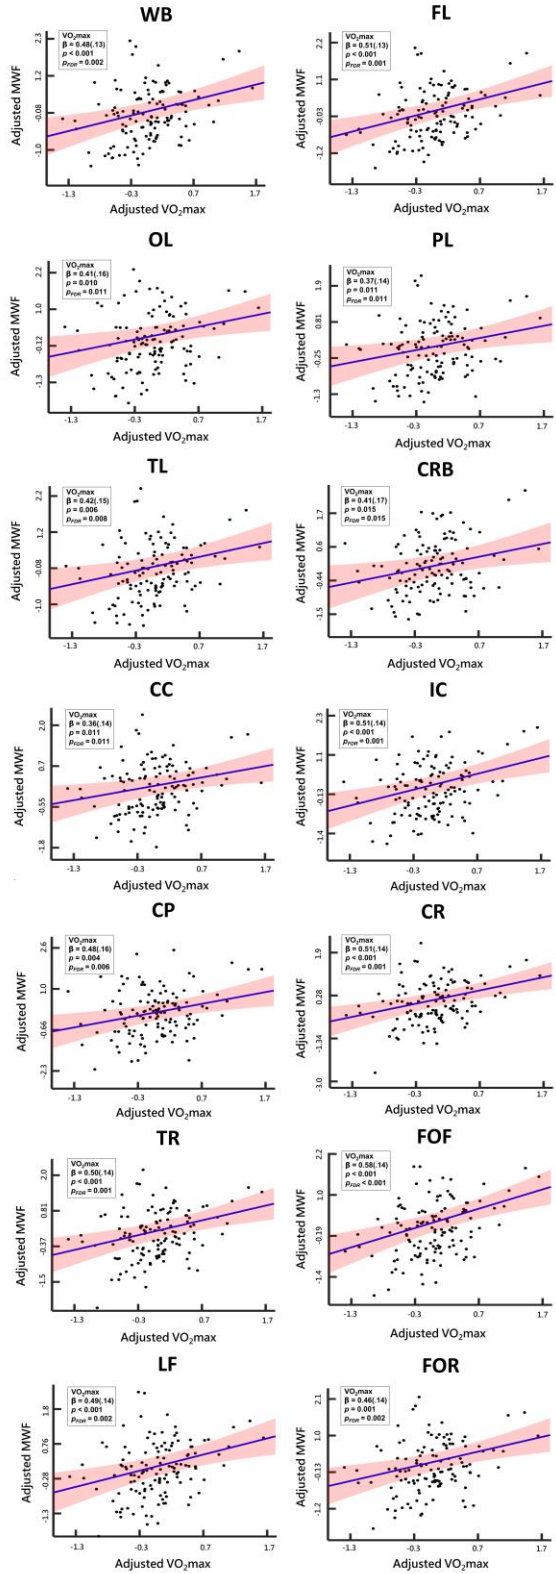

**Fig. S2.** Association of myelin water fraction (MWF) with maximum rate of oxygen consumption ( $VO_{2max}$ ) within all 14 white matter ROIs derived using model #1 or model #2. The line of best fit (blue solid line), confidence intervals (shaded red), regression coefficients (standard error),  $p$  value, and FDR-corrected  $p$  value derived from the linear regression models adjusted for covariates are also displayed. The adjusted response function describes the relationship between the fitted response and MWF, with the remaining z-scored predictors set to 0.

*Notes.* ROI, region-of-interest; WB, whole brain; FL, frontal lobe; OL, occipital lobe; PL, parietal lobe; TL, temporal lobe; CRB, cerebellum; CC, corpus callosum; IC, internal capsule; CP, cerebral peduncle; CR, corona radiata; TR, thalamic radiation; FOF, fronto-occipital fasciculus; LF, longitudinal fasciculus; FOR, forceps.

Model 1

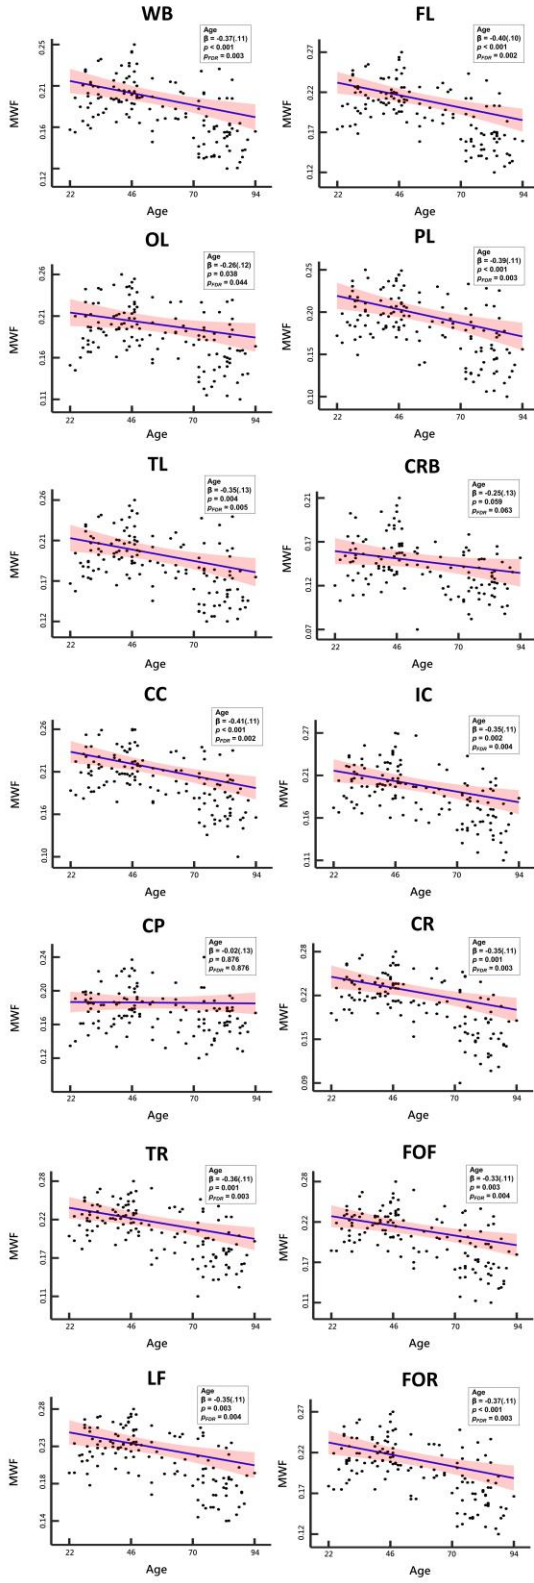

Model 2

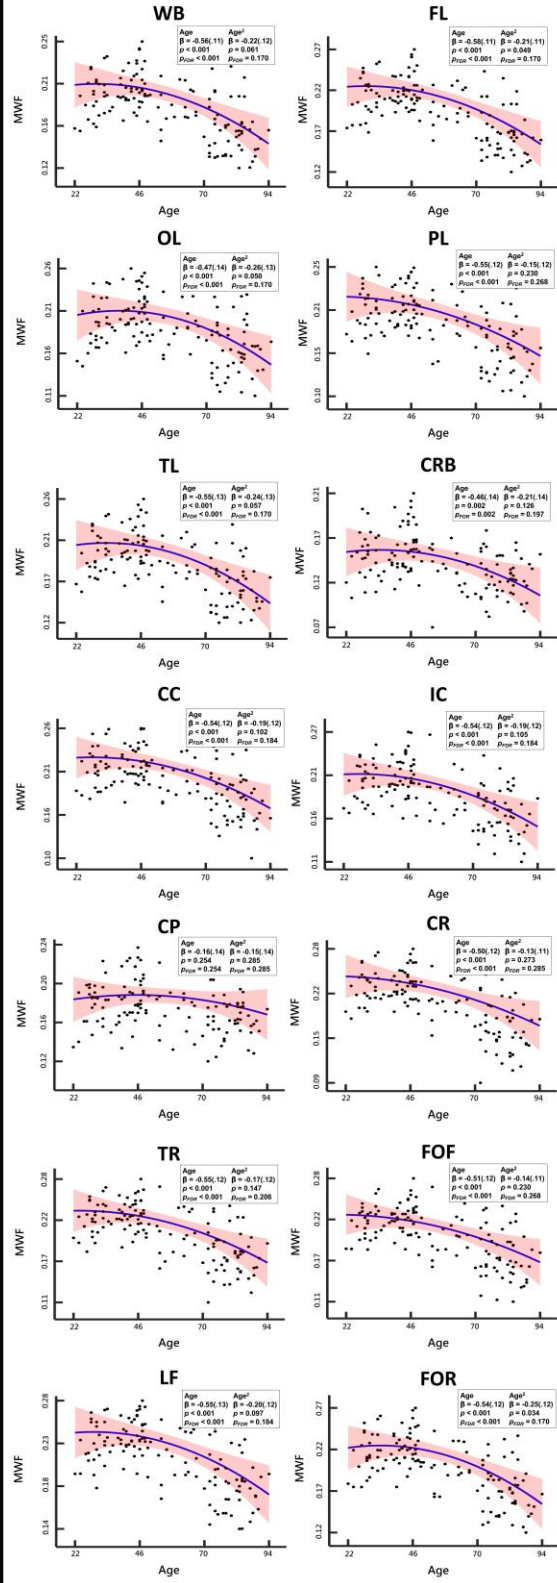

**Fig. S3.** Association of myelin water fraction (MWF) with age in all 14 white matter ROIs derived using model #1 and model #2. The line of best fit (blue solid line), confidence intervals (shaded red), regression coefficients (standard error),  $p$  value, and FDR-corrected  $p$  value derived from the linear regression models adjusted for covariates are also displayed.

*Notes.* ROI, region-of-interest; WB, whole brain; FL, frontal lobe; OL, occipital lobe; PL, parietal lobe; TL, temporal lobe; CRB, cerebellum; CC, corpus callosum; IC, internal capsule; CP, cerebral peduncle; CR, corona radiata; TR, thalamic radiation; FOF, fronto-occipital fasciculus; LF, longitudinal fasciculus; FOR, forceps.

### Model 1

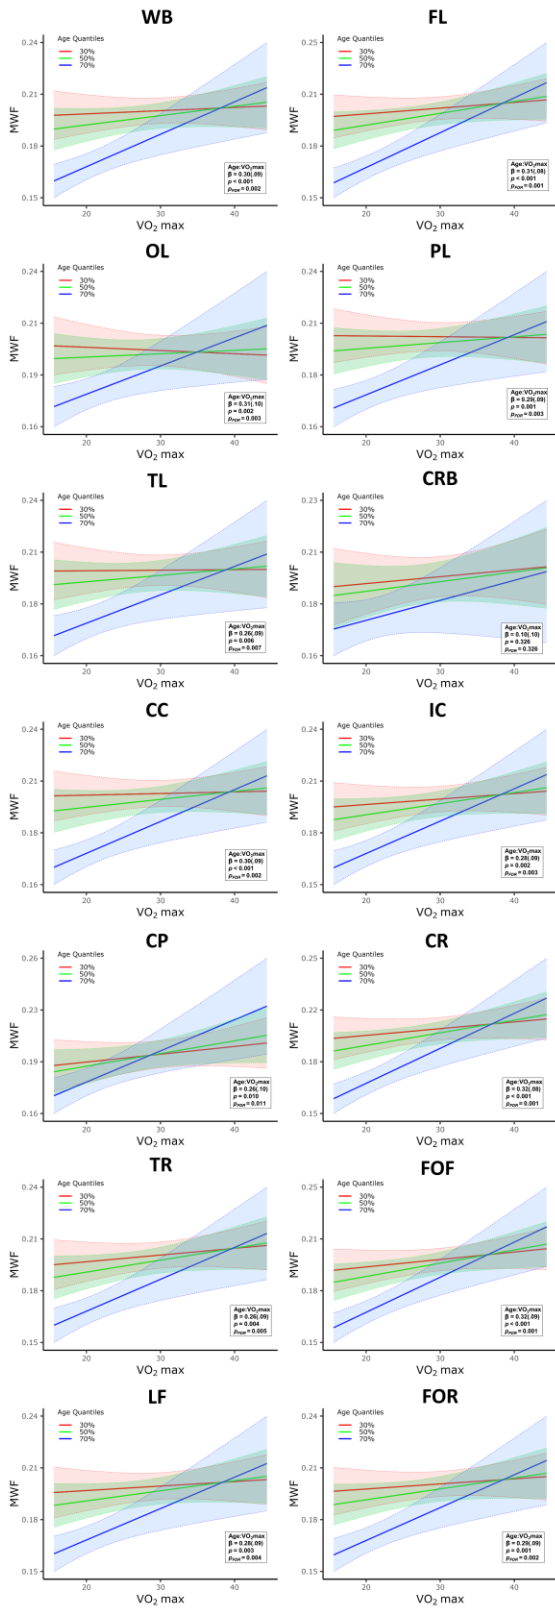

### Model 2

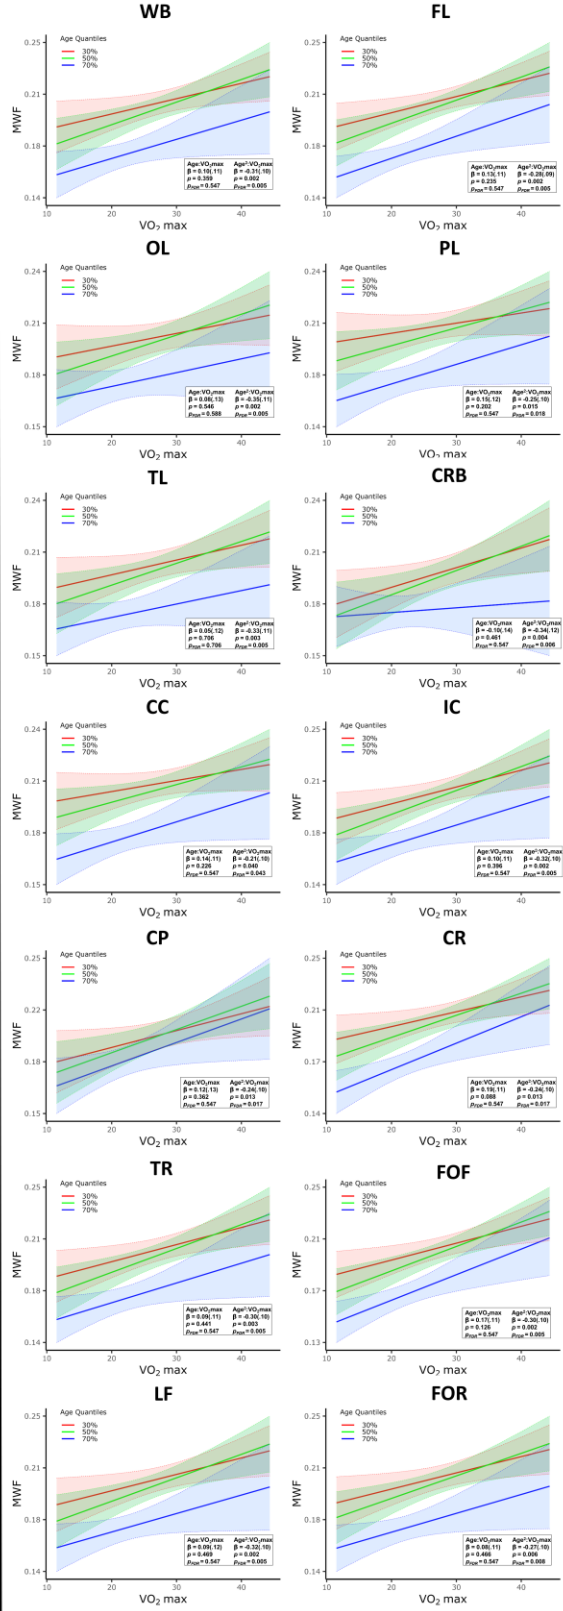

**Fig. S4.** Age-stratified associations between myelin water fraction (MWF) and maximum rate of oxygen consumption ( $VO_2\text{max}$ ) in all 14 white matter ROIs derived using model #1 and model #2. The colored lines correspond to the 30th (red), 50th (green), and 70th (blue) quantiles of age. The line of best fit (solid line), confidence intervals (shaded regions), regression coefficients (standard error),  $p$  value, and FDR-corrected  $p$  value derived from the linear regression models adjusted for covariates are also displayed.

*Notes.* ROI, region-of-interest; WB, whole brain; FL, frontal lobe; OL, occipital lobe; PL, parietal lobe; TL, temporal lobe; CRB, cerebellum; CC, corpus callosum; IC, internal capsule; CP, cerebral peduncle; CR, corona radiata; TR, thalamic radiation; FOF, fronto-occipital fasciculus; LF, longitudinal fasciculus; FOR, forceps.



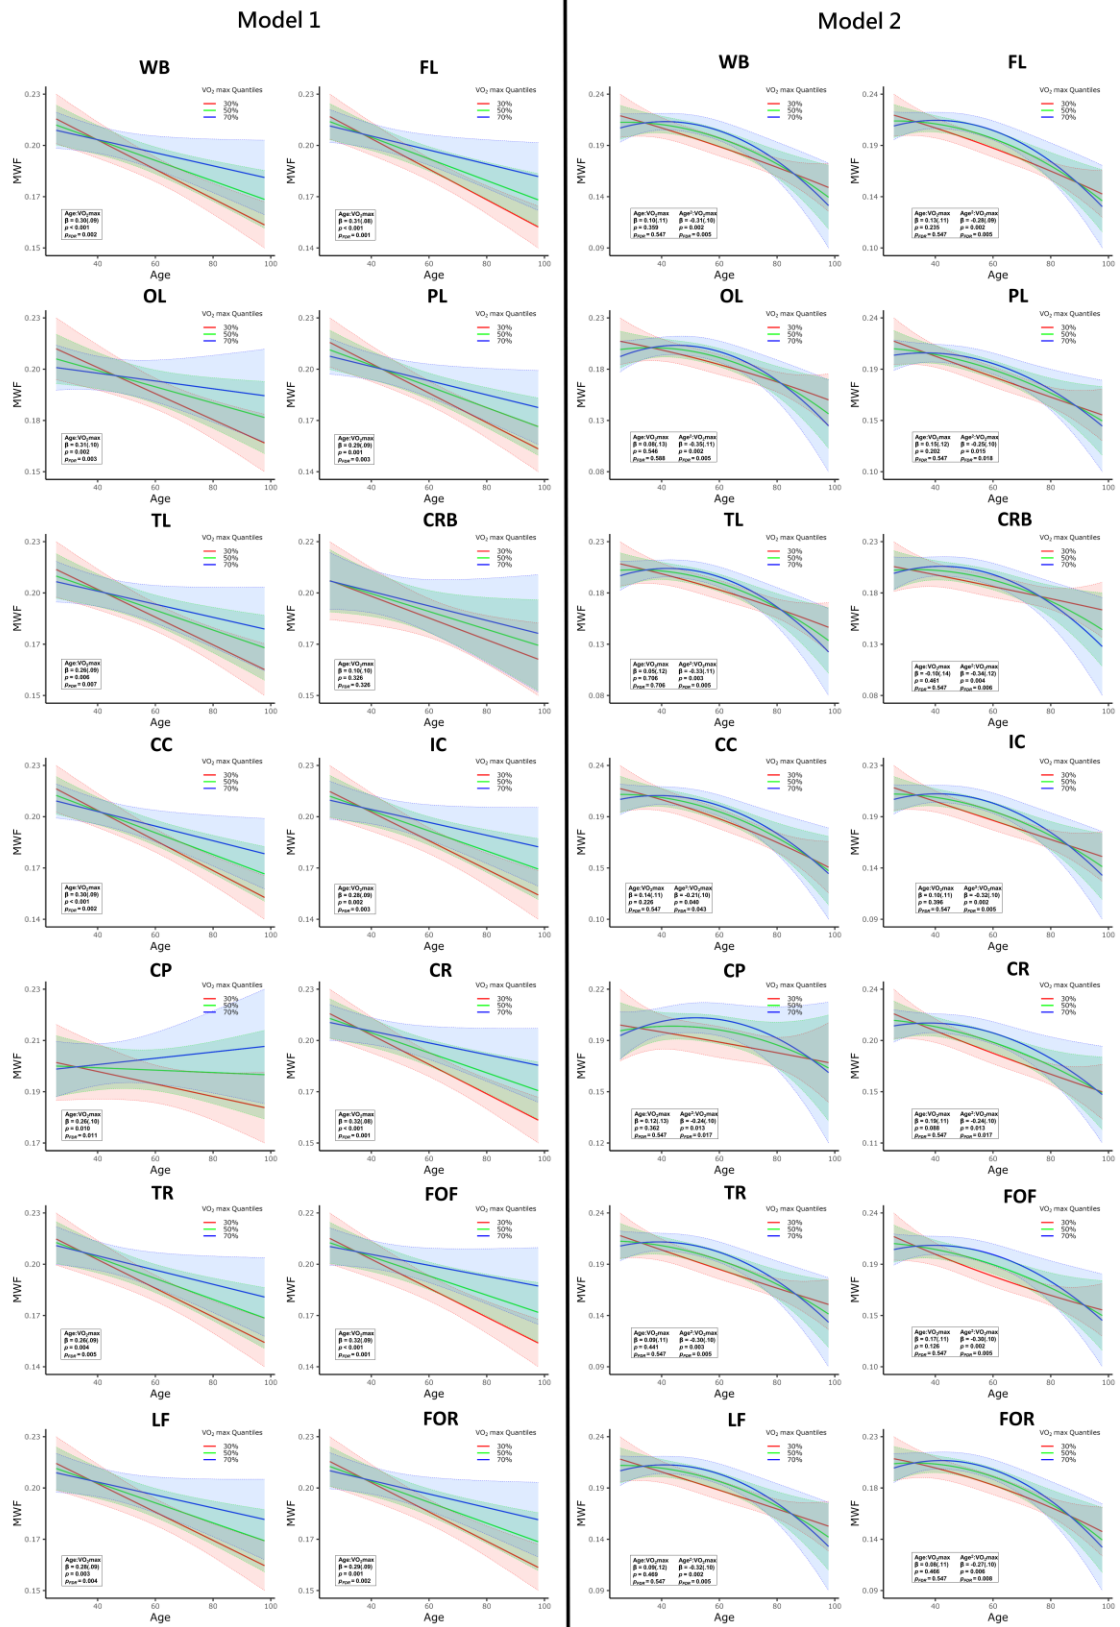

**Fig. S5.** VO<sub>2</sub>max-stratified associations between myelin water fraction (MWF) and age in all 14 white matter ROIs derived using model #1 and model #2. The colored lines correspond to the 30th

(red), 50th (green), and 70th (blue) quantiles of maximum rate of oxygen consumption ( $VO_2\max$ ). The line of best fit (solid line), confidence intervals (shaded regions), regression coefficients (standard error),  $p$  value, and FDR-corrected  $p$  value derived from the linear regression models adjusted for covariates are also displayed.

*Notes.* ROI, region-of-interest; WB, whole brain; FL, frontal lobe; OL, occipital lobe; PL, parietal lobe; TL, temporal lobe; CRB, cerebellum; CC, corpus callosum; IC, internal capsule; CP, cerebral peduncle; CR, corona radiata; TR, thalamic radiation; FOF, fronto-occipital fasciculus; LF, longitudinal fasciculus; FOR, forceps.

**Table 1S.** Regression coefficient (standard error) and  $p$ -values (before,  $p$ , and after FDR correction,  $p_{FDR}$ ) of age, VO<sub>2</sub>max, age×VO<sub>2</sub>max, sex, and SBP with respect to MWF (Model 1) for each of the 14 WM ROIs investigated.

| ROIs | MWF                                                               |                                                               |                                                                  |                                                                |                                              |
|------|-------------------------------------------------------------------|---------------------------------------------------------------|------------------------------------------------------------------|----------------------------------------------------------------|----------------------------------------------|
|      | Model 1                                                           |                                                               |                                                                  |                                                                |                                              |
|      | Age                                                               | VO <sub>2</sub> max                                           | Age × VO <sub>2</sub> max                                        | Sex                                                            | SBP                                          |
| WB   | -0.37(0.11),<br><b><math>p&lt;0.001</math></b><br>$p_{FDR}=0.003$ | 0.25(0.11),<br><b><math>p=0.027</math></b><br>$p_{FDR}=0.047$ | 0.30(0.09),<br><b><math>p&lt;0.001</math></b><br>$p_{FDR}=0.002$ | -0.28(0.16),<br>$p=0.076$<br>$p_{FDR}=0.191$                   | 0.01(0.08),<br>$p=0.881$<br>$p_{FDR}=0.959$  |
| FL   | -0.40(0.10),<br><b><math>p&lt;0.001</math></b><br>$p_{FDR}=0.002$ | 0.30(0.10),<br><b><math>p=0.004</math></b><br>$p_{FDR}=0.020$ | 0.31(0.08),<br><b><math>p&lt;0.001</math></b><br>$p_{FDR}=0.001$ | -0.31(0.14),<br><b><math>p=0.035</math></b><br>$p_{FDR}=0.191$ | 0.08(0.07),<br>$p=0.289$<br>$p_{FDR}=0.959$  |
| OL   | -0.26(0.12),<br><b><math>p=0.038</math></b><br>$p_{FDR}=0.044$    | 0.15(0.13),<br>$p=0.219$<br>$p_{FDR}=0.236$                   | 0.31(0.09),<br><b><math>p=0.002</math></b><br>$p_{FDR}=0.003$    | -0.19(0.18),<br>$p=0.285$<br>$p_{FDR}=0.360$                   | -0.06(0.09),<br>$p=0.465$<br>$p_{FDR}=0.959$ |
| PL   | -0.39(0.11),<br><b><math>p&lt;0.001</math></b><br>$p_{FDR}=0.003$ | 0.18(0.11),<br>$p=0.111$<br>$p_{FDR}=0.141$                   | 0.29(0.08),<br><b><math>p=0.001</math></b><br>$p_{FDR}=0.003$    | -0.28(0.16),<br>$p=0.082$<br>$p_{FDR}=0.191$                   | -0.01(0.08),<br>$p=0.891$<br>$p_{FDR}=0.959$ |
| TL   | -0.35(0.12),<br><b><math>p=0.004</math></b><br>$p_{FDR}=0.005$    | 0.18(0.12),<br>$p=0.136$<br>$p_{FDR}=0.158$                   | 0.26(0.09),<br><b><math>p=0.006</math></b><br>$p_{FDR}=0.007$    | -0.22(0.17),<br>$p=0.194$<br>$p_{FDR}=0.302$                   | -0.03(0.08),<br>$p=0.704$<br>$p_{FDR}=0.959$ |
| CRB  | -0.25(0.13),<br>$p=0.059$<br>$p_{FDR}=0.063$                      | 0.15(0.13),<br>$p=0.265$<br>$p_{FDR}=0.265$                   | 0.10(0.10),<br>$p=0.326$<br>$p_{FDR}=0.326$                      | -0.18(0.18),<br>$p=0.335$<br>$p_{FDR}=0.360$                   | 0.01(0.09),<br>$p=0.885$<br>$p_{FDR}=0.959$  |
| CC   | -0.41(0.11),<br><b><math>p&lt;0.001</math></b><br>$p_{FDR}=0.002$ | 0.22(0.11),<br><b><math>p=0.046</math></b><br>$p_{FDR}=0.064$ | 0.30(0.09),<br><b><math>p&lt;0.001</math></b><br>$p_{FDR}=0.002$ | -0.34(0.15),<br><b><math>p=0.028</math></b><br>$p_{FDR}=0.191$ | 0.05(0.08),<br>$p=0.540$<br>$p_{FDR}=0.959$  |
| IC   | -0.35(0.11),<br><b><math>p=0.002</math></b><br>$p_{FDR}=0.004$    | 0.27(0.11),<br><b><math>p=0.018</math></b><br>$p_{FDR}=0.038$ | 0.28(0.09),<br><b><math>p=0.002</math></b><br>$p_{FDR}=0.003$    | -0.15(0.16),<br>$p=0.329$<br>$p_{FDR}=0.360$                   | -0.04(0.08),<br>$p=0.628$<br>$p_{FDR}=0.959$ |
| CP   | -0.02(0.13),<br>$p=0.876$<br>$p_{FDR}=0.876$                      | 0.30(0.13),<br><b><math>p=0.019</math></b><br>$p_{FDR}=0.038$ | 0.26(0.10),<br><b><math>p=0.010</math></b><br>$p_{FDR}=0.011$    | -0.37(0.18),<br><b><math>p=0.042</math></b><br>$p_{FDR}=0.191$ | -0.06(0.09),<br>$p=0.523$<br>$p_{FDR}=0.959$ |
| CR   | -0.35(0.11),<br><b><math>p=0.001</math></b><br>$p_{FDR}=0.003$    | 0.32(0.11),<br><b><math>p=0.003</math></b><br>$p_{FDR}=0.020$ | 0.32(0.08),<br><b><math>p&lt;0.001</math></b><br>$p_{FDR}=0.001$ | -0.27(0.15),<br>$p=0.075$<br>$p_{FDR}=0.191$                   | 0.04(0.07),<br>$p=0.632$<br>$p_{FDR}=0.959$  |
| TR   | -0.36(0.11),<br><b><math>p=0.001</math></b><br>$p_{FDR}=0.003$    | 0.27(0.11),<br><b><math>p=0.017</math></b><br>$p_{FDR}=0.038$ | 0.26(0.09),<br><b><math>p=0.004</math></b><br>$p_{FDR}=0.005$    | -0.16(0.16),<br>$p=0.312$<br>$p_{FDR}=0.360$                   | <0.01(0.08),<br>$p=0.968$<br>$p_{FDR}=0.968$ |
| FOF  | -0.33(0.11),<br><b><math>p=0.003</math></b><br>$p_{FDR}=0.004$    | 0.34(0.11),<br><b><math>p=0.002</math></b><br>$p_{FDR}=0.020$ | 0.32(0.09),<br><b><math>p&lt;0.001</math></b><br>$p_{FDR}=0.001$ | -0.07(0.15),<br>$p=0.638$<br>$p_{FDR}=0.638$                   | 0.02(0.07),<br>$p=0.828$<br>$p_{FDR}=0.959$  |
| LF   | -0.35(0.11),<br><b><math>p=0.003</math></b>                       | 0.25(0.12),<br><b><math>p=0.032</math></b>                    | 0.28(0.09),<br><b><math>p=0.003</math></b>                       | -0.27(0.16),<br>$p=0.097$                                      | 0.01(0.08),<br>$p=0.861$                     |

|     |                                                |                                            |                                            |                           |                          |
|-----|------------------------------------------------|--------------------------------------------|--------------------------------------------|---------------------------|--------------------------|
|     | <b><math>p_{FDR}=0.004</math></b>              | $p_{FDR}=0.050$                            | <b><math>p_{FDR}=0.004</math></b>          | $p_{FDR}=0.194$           | $p_{FDR}=0.959$          |
| FOR | -0.37(0.11),<br><b><math>p&lt;0.001</math></b> | 0.27(0.11),<br><b><math>p=0.015</math></b> | 0.29(0.09),<br><b><math>p=0.001</math></b> | -0.25(0.15),<br>$p=0.111$ | 0.02(0.08),<br>$p=0.777$ |
|     | <b><math>p_{FDR}=0.003</math></b>              | <b><math>p_{FDR}=0.038</math></b>          | <b><math>p_{FDR}=0.002</math></b>          | $p_{FDR}=0.194$           | $p_{FDR}=0.959$          |

Notes. VO<sub>2</sub>max, maximum volume rate of oxygen; MWF, myelin water fraction; SBP, systolic blood pressure; WM, white matter; ROI, region-of-interest; WB, whole brain; FL, frontal lobe; OL, occipital lobe; PL, parietal lobe; TL, temporal lobe; CRB, cerebellum; CC, corpus callosum; IC, internal capsule; CP, cerebral peduncle; CR, corona radiata; TR, thalamic radiation; FOF, fronto-occipital fasciculus; LF, longitudinal fasciculus; FOR, forceps. Bolded values indicate statistical significance ( $p$  or  $p_{FDR} < 0.05$ ). Standard error (SE) values are italicized.

**Table 2S.** Regression coefficient (standard error) and  $p$ -values (before,  $p$ , and after FDR correction,  $p_{FDR}$ ) of age, age<sup>2</sup>, VO<sub>2</sub>max, age $\times$ VO<sub>2</sub>max, age<sup>2</sup> $\times$ VO<sub>2</sub>max, sex, and SBP with respect to MWF (Model 2) for each of the 14 WM ROIs investigated.

| ROIs | MWF                                                                   |                                                                    |                                                                      |                                                  |                                                                    |                                                                    |                                                  |
|------|-----------------------------------------------------------------------|--------------------------------------------------------------------|----------------------------------------------------------------------|--------------------------------------------------|--------------------------------------------------------------------|--------------------------------------------------------------------|--------------------------------------------------|
|      | Model 2                                                               |                                                                    |                                                                      |                                                  |                                                                    |                                                                    |                                                  |
|      | Age                                                                   | Age <sup>2</sup>                                                   | VO <sub>2</sub> max                                                  | Age $\times$ VO <sub>2</sub> max                 | Age <sup>2</sup> $\times$ VO <sub>2</sub> max                      | Sex                                                                | SBP                                              |
| WB   | -0.56(0.12),<br><b><math>p &lt; 0.001</math></b><br>$p_{FDR} < 0.001$ | -0.22(0.12),<br>$p = 0.061$<br>$p_{FDR} = 0.170$                   | 0.48(0.13),<br><b><math>p &lt; 0.001</math></b><br>$p_{FDR} = 0.002$ | 0.10(0.11),<br>$p = 0.359$<br>$p_{FDR} = 0.547$  | -0.31(0.10),<br><b><math>p = 0.002</math></b><br>$p_{FDR} = 0.005$ | -0.33(0.15),<br><b><math>p = 0.031</math></b><br>$p_{FDR} = 0.085$ | 0.02(0.07),<br>$p = 0.763$<br>$p_{FDR} = 0.873$  |
| FL   | -0.58(0.11),<br><b><math>p &lt; 0.001</math></b><br>$p_{FDR} < 0.001$ | -0.21(0.11),<br><b><math>p = 0.049</math></b><br>$p_{FDR} = 0.170$ | 0.51(0.13),<br><b><math>p &lt; 0.001</math></b><br>$p_{FDR} = 0.001$ | 0.13(0.11),<br>$p = 0.235$<br>$p_{FDR} = 0.547$  | -0.28(0.09),<br><b><math>p = 0.002</math></b><br>$p_{FDR} = 0.005$ | -0.35(0.14),<br><b><math>p = 0.013</math></b><br>$p_{FDR} = 0.085$ | 0.08(0.07),<br>$p = 0.228$<br>$p_{FDR} = 0.873$  |
| OL   | -0.47(0.14), <b><math>p &lt; 0.001</math></b><br>$p_{FDR} < 0.001$    | -0.26(0.12),<br><b><math>p = 0.049</math></b><br>$p_{FDR} = 0.170$ | 0.41(0.16),<br><b><math>p = 0.010</math></b><br>$p_{FDR} = 0.011$    | 0.08(0.13),<br>$p = 0.546$<br>$p_{FDR} = 0.588$  | -0.35(0.11),<br><b><math>p = 0.002</math></b><br>$p_{FDR} = 0.005$ | -0.24(0.17),<br>$p = 0.154$<br>$p_{FDR} = 0.202$                   | -0.05(0.08),<br>$p = 0.540$<br>$p_{FDR} = 0.873$ |
| PL   | -0.55(0.12), <b><math>p &lt; 0.001</math></b><br>$p_{FDR} < 0.001$    | -0.15(0.12),<br>$p = 0.230$<br>$p_{FDR} = 0.268$                   | 0.37(0.14),<br><b><math>p = 0.011</math></b><br>$p_{FDR} = 0.011$    | 0.15(0.12),<br>$p = 0.202$<br>$p_{FDR} = 0.547$  | -0.25(0.10),<br><b><math>p = 0.015</math></b><br>$p_{FDR} = 0.018$ | -0.32(0.16),<br><b><math>p = 0.043</math></b><br>$p_{FDR} = 0.085$ | <0.01(0.08),<br>$p = 0.983$<br>$p_{FDR} = 0.983$ |
| TL   | -0.55(0.13), <b><math>p &lt; 0.001</math></b><br>$p_{FDR} < 0.001$    | -0.24(0.13),<br>$p = 0.057$<br>$p_{FDR} = 0.170$                   | 0.42(0.15),<br><b><math>p = 0.006</math></b><br>$p_{FDR} = 0.008$    | 0.05(0.12),<br>$p = 0.706$<br>$p_{FDR} = 0.706$  | -0.33(0.11),<br><b><math>p = 0.003</math></b><br>$p_{FDR} = 0.005$ | -0.27(0.16),<br>$p = 0.098$<br>$p_{FDR} = 0.153$                   | -0.02(0.08),<br>$p = 0.799$<br>$p_{FDR} = 0.873$ |
| CRB  | -0.46(0.14),<br><b><math>p = 0.002</math></b><br>$p_{FDR} = 0.002$    | -0.21(0.14),<br>$p = 0.126$<br>$p_{FDR} = 0.197$                   | 0.41(0.17),<br><b><math>p = 0.015</math></b><br>$p_{FDR} = 0.015$    | -0.10(0.14),<br>$p = 0.461$<br>$p_{FDR} = 0.547$ | -0.34(0.12),<br><b><math>p = 0.004</math></b><br>$p_{FDR} = 0.006$ | -0.24(0.18),<br>$p = 0.190$<br>$p_{FDR} = 0.205$                   | 0.03(0.09),<br>$p = 0.749$<br>$p_{FDR} = 0.873$  |
| CC   | -0.54(0.12),<br><b><math>p &lt; 0.001</math></b><br>$p_{FDR} < 0.001$ | -0.19(0.12),<br>$p = 0.095$<br>$p_{FDR} = 0.184$                   | 0.36(0.14),<br><b><math>p = 0.011</math></b><br>$p_{FDR} = 0.011$    | 0.14(0.11),<br>$p = 0.226$<br>$p_{FDR} = 0.547$  | -0.21(0.10),<br><b><math>p = 0.040</math></b><br>$p_{FDR} = 0.043$ | -0.37(0.15),<br><b><math>p = 0.016</math></b><br>$p_{FDR} = 0.085$ | 0.05(0.08),<br>$p = 0.519$<br>$p_{FDR} = 0.873$  |
| IC   | -0.54(0.12),<br><b><math>p &lt; 0.001</math></b><br>$p_{FDR} < 0.001$ | -0.19(0.12),<br>$p = 0.098$<br>$p_{FDR} = 0.184$                   | 0.51(0.14),<br><b><math>p &lt; 0.001</math></b><br>$p_{FDR} = 0.001$ | 0.10(0.11),<br>$p = 0.396$<br>$p_{FDR} = 0.547$  | -0.32(0.10),<br><b><math>p = 0.002</math></b><br>$p_{FDR} = 0.005$ | -0.21(0.15),<br>$p = 0.173$<br>$p_{FDR} = 0.202$                   | -0.02(0.08),<br>$p = 0.766$<br>$p_{FDR} = 0.873$ |
| CP   | -0.16(0.14),<br>$p = 0.254$<br>$p_{FDR} = 0.254$                      | -0.15(0.14),<br>$p = 0.285$<br>$p_{FDR} = 0.285$                   | 0.48(0.16),<br><b><math>p = 0.004</math></b><br>$p_{FDR} = 0.006$    | 0.12(0.13),<br>$p = 0.362$<br>$p_{FDR} = 0.547$  | -0.24(0.12),<br><b><math>p = 0.045</math></b><br>$p_{FDR} = 0.045$ | -0.41(0.18),<br><b><math>p = 0.024</math></b><br>$p_{FDR} = 0.085$ | -0.05(0.09),<br>$p = 0.607$<br>$p_{FDR} = 0.873$ |
| CR   | -0.50(0.12),<br><b><math>p &lt; 0.001</math></b><br>$p_{FDR} < 0.001$ | -0.13(0.11),<br>$p = 0.273$<br>$p_{FDR} = 0.285$                   | 0.51(0.14),<br><b><math>p &lt; 0.001</math></b><br>$p_{FDR} = 0.001$ | 0.19(0.11),<br>$p = 0.088$<br>$p_{FDR} = 0.547$  | -0.24(0.10),<br><b><math>p = 0.013</math></b><br>$p_{FDR} = 0.017$ | -0.31(0.15),<br><b><math>p = 0.037</math></b><br>$p_{FDR} = 0.085$ | 0.05(0.07),<br>$p = 0.508$<br>$p_{FDR} = 0.873$  |
| TR   | -0.55(0.12),<br><b><math>p &lt; 0.001</math></b><br>$p_{FDR} < 0.001$ | -0.17(0.12),<br>$p = 0.147$<br>$p_{FDR} = 0.206$                   | 0.50(0.14),<br><b><math>p &lt; 0.001</math></b><br>$p_{FDR} = 0.001$ | 0.09(0.11),<br>$p = 0.441$<br>$p_{FDR} = 0.547$  | -0.30(0.10),<br><b><math>p = 0.003</math></b><br>$p_{FDR} = 0.005$ | -0.21(0.15),<br>$p = 0.168$<br>$p_{FDR} = 0.202$                   | 0.02(0.08),<br>$p = 0.810$<br>$p_{FDR} = 0.873$  |
| FOF  | -0.51(0.12),<br><b><math>p &lt; 0.001</math></b><br>$p_{FDR} < 0.001$ | -0.14(0.11),<br>$p = 0.230$<br>$p_{FDR} = 0.268$                   | 0.58(0.14),<br><b><math>p &lt; 0.001</math></b><br>$p_{FDR} < 0.001$ | 0.17(0.11),<br>$p = 0.126$<br>$p_{FDR} = 0.547$  | -0.30(0.10),<br><b><math>p = 0.002</math></b><br>$p_{FDR} = 0.005$ | -0.13(0.15),<br>$p = 0.390$<br>$p_{FDR} = 0.390$                   | 0.04(0.07),<br>$p = 0.635$<br>$p_{FDR} = 0.873$  |
| LF   | -0.55(0.13),<br><b><math>p &lt; 0.001</math></b><br>$p_{FDR} < 0.001$ | -0.20(0.12),<br>$p = 0.097$<br>$p_{FDR} = 0.184$                   | 0.49(0.14),<br><b><math>p &lt; 0.001</math></b><br>$p_{FDR} = 0.002$ | 0.09(0.12),<br>$p = 0.469$<br>$p_{FDR} = 0.547$  | -0.32(0.10),<br><b><math>p = 0.002</math></b><br>$p_{FDR} = 0.005$ | -0.33(0.16),<br><b><math>p = 0.041</math></b><br>$p_{FDR} = 0.085$ | 0.03(0.08),<br>$p = 0.719$<br>$p_{FDR} = 0.873$  |
| FOR  | -0.54(0.12),<br><b><math>p &lt; 0.001</math></b><br>$p_{FDR} < 0.001$ | -0.25(0.12),<br><b><math>p = 0.034</math></b><br>$p_{FDR} = 0.170$ | 0.46(0.14),<br><b><math>p = 0.001</math></b><br>$p_{FDR} = 0.002$    | 0.08(0.11),<br>$p = 0.466$<br>$p_{FDR} = 0.547$  | -0.27(0.10),<br><b><math>p = 0.006</math></b><br>$p_{FDR} = 0.008$ | -0.29(0.15),<br>$p = 0.058$<br>$p_{FDR} = 0.102$                   | 0.03(0.07),<br>$p = 0.730$<br>$p_{FDR} = 0.873$  |

*Notes.*  $VO_2$ max, maximum volume rate of oxygen; MWF, myelin water fraction; SBP, systolic blood pressure; WM, white matter; ROI, region-of-interest; WB, whole brain; FL, frontal lobe; OL, occipital lobe; PL, parietal lobe; TL, temporal lobe; CRB, cerebellum; CC, corpus callosum; IC, internal capsule; CP, cerebral peduncle; CR, corona radiata; TR, thalamic radiation; FOF, fronto-occipital fasciculus; LF, longitudinal fasciculus; FOR, forceps. Bolded values indicate statistical significance ( $p$  or  $p_{FDR} < 0.05$ ). Standard error (SE) values are italicized.
